# Supplementary material for: Learning to Improve: Using Writing to Increase Critical Thinking Performance in General Education Biology
Source: Atypon-hosted journal article supplement (doi:10.1187/cbe.06-11-0203), 2007-06-01
Supplement: appendix_2.pdf [file appendix_2.pdf]

## Appendix 2

### *Thought Question Evaluation Rubric*

| <b>Score</b> | <b>Characteristics</b>                                                                                                                                                                                                                                                                                                                                                                                                                                                                  |
|--------------|-----------------------------------------------------------------------------------------------------------------------------------------------------------------------------------------------------------------------------------------------------------------------------------------------------------------------------------------------------------------------------------------------------------------------------------------------------------------------------------------|
| 5            | <p>SUPERB response, with <i>all</i> of the following characteristics. This paper:</p> <ul style="list-style-type: none"><li>• clearly and appropriately responds to the topic</li><li>• fully develops one clear main idea</li><li>• is clearly and coherently organized</li><li>• uses specific and appropriate details</li><li>• demonstrates a tacit understanding of the theories in question</li><li>• demonstrates intellectual sophistication and creativity</li></ul>           |
| 4            | <p>EXCELLENT response, with <i>all</i> or <i>most</i> of the following characteristics. This paper:</p> <ul style="list-style-type: none"><li>• clearly and appropriately responds to the topic</li><li>• fully develops one clear main idea</li><li>• is clearly and coherently organized</li><li>• uses specific and appropriate details</li><li>• demonstrates a tacit understanding of the theories in question</li><li>• may not demonstrate intellectual sophistication</li></ul> |
| 3            | <p>GOOD response, with <i>all</i> or <i>most</i> of the following characteristics. This paper:</p> <ul style="list-style-type: none"><li>• responds appropriately to the assigned topic</li><li>• is generally well developed around a central idea</li><li>• is clearly organized, with few or no irrelevant sections</li><li>• uses appropriate details</li></ul>                                                                                                                     |
| 2            | <p>ADEQUATE response, with <i>all</i> or <i>most</i> of the following characteristics. This paper:</p> <ul style="list-style-type: none"><li>• responds to the assigned topic</li><li>• contains adequate development of a main idea, though the main idea maybe simplistic</li><li>• has adequate organization, though it may be redundant in places</li><li>• uses sufficient details to make the response clear</li></ul>                                                            |
| 1            | <p>BARELY ADEQUATE or INADEQUATE response, with <i>all</i> or <i>most</i> of the following characteristics. This paper:</p> <ul style="list-style-type: none"><li>• may not respond to the assigned topic</li><li>• if it responds to the topic, may be unclear in many parts of the response</li><li>• has poorly developed or no main idea</li><li>• is poorly organized, or has many irrelevant sections</li><li>• has few details, or has irrelevant details</li></ul>              |

Based on guide developed March 1994 by T. Beers, C. McIssac, B. Henderson, and J. Gainen.
