# Supplementary material for: Learning to Improve: Using Writing to Increase Critical Thinking Performance in General Education Biology
Source: Atypon-hosted journal article supplement (doi:10.1187/cbe.06-11-0203), 2007-06-01
Supplement: appendix_3.pdf [file appendix_3.pdf]

## Appendix 3

### Peer Evaluation Rubric

| <b>Contributions</b>    | <b>4</b>                                                                                                                                    | <b>3</b>                                                                                                                                           | <b>2</b>                                                                                                                                    | <b>1</b>                                                                                                                                 |
|-------------------------|---------------------------------------------------------------------------------------------------------------------------------------------|----------------------------------------------------------------------------------------------------------------------------------------------------|---------------------------------------------------------------------------------------------------------------------------------------------|------------------------------------------------------------------------------------------------------------------------------------------|
|                         | <i>Routinely</i> provides useful ideas in group participation and discussion. A <i>definite leader</i> who contributes a lot of effort.     | <i>Usually</i> provides useful ideas in group participation and discussion. A <i>strong</i> group member who tries hard!                           | <i>Sometimes</i> provides useful ideas in group participation and discussion. A <i>satisfactory</i> group member who does what is required. | <i>Rarely</i> provides useful ideas in group participation and discussion. May <i>refuse</i> to participate.                             |
| <b>Quality of Work</b>  | <b>4</b>                                                                                                                                    | <b>3</b>                                                                                                                                           | <b>2</b>                                                                                                                                    | <b>1</b>                                                                                                                                 |
|                         | Contributed work is of <i>exceptional</i> quality and sets a high standard of excellence.                                                   | Contributed work is of <i>high quality</i> that provides an example of good quality work.                                                          | Provides <i>average quality</i> work that occasionally needs to be redone by other group members to ensure quality.                         | Provides <i>low quality</i> work that usually needs to be redone by others to ensure quality.                                            |
| <b>Effort</b>           | <b>4</b>                                                                                                                                    | <b>3</b>                                                                                                                                           | <b>2</b>                                                                                                                                    | <b>1</b>                                                                                                                                 |
|                         | Work clearly reflects the student's <i>best efforts</i> .                                                                                   | Work reflects a <i>strong effort</i> from student.                                                                                                 | Work reflects a <i>reasonable effort</i> from student.                                                                                      | Work reflects <i>little effort</i> on the part of student.                                                                               |
| <b>Attitude</b>         | <b>4</b>                                                                                                                                    | <b>3</b>                                                                                                                                           | <b>2</b>                                                                                                                                    | <b>1</b>                                                                                                                                 |
|                         | Public criticism of work is based on sound reasoning and is <i>never</i> personal. <i>Always</i> has a positive attitude about the task(s). | Public criticism of work is <i>mostly</i> based on reasoning and is <i>never</i> personal. <i>Often</i> has a positive attitude about the task(s). | Criticism of work is based mostly on opinion and is somewhat personal. <i>Usually</i> has a positive attitude about the task(s).            | <i>Often</i> is publicly and personally critical of the project or others' work. <i>Often</i> has a negative attitude about the task(s). |
| <b>Focus on Task</b>    | <b>4</b>                                                                                                                                    | <b>3</b>                                                                                                                                           | <b>2</b>                                                                                                                                    | <b>1</b>                                                                                                                                 |
|                         | <i>Consistently</i> stays focused on task and what needs to be done. Very self-directed.                                                    | Mostly focused on task and what needs to be done. Other group members can count on this person.                                                    | <i>Somewhat</i> focused on task. Other group members must sometimes remind this person to stay on task.                                     | <i>Rarely</i> focuses on the task and what needs to be done. Lets others do the work.                                                    |
| <b>Work with Others</b> | <b>4</b>                                                                                                                                    | <b>3</b>                                                                                                                                           | <b>2</b>                                                                                                                                    | <b>1</b>                                                                                                                                 |
|                         | <i>Almost always</i> listens to and supports the efforts of others. Tries to keep people working well together.                             | <i>Usually</i> listens to and supports the efforts of others. Does not cause "waves" in the group.                                                 | <i>Often</i> listens to and supports the efforts of others, but sometimes is not a good team member.                                        | <i>Rarely</i> listens to and supports the efforts of others. Often is not a good team player.                                            |
| <b>Problem-solving</b>  | <b>4</b>                                                                                                                                    | <b>3</b>                                                                                                                                           | <b>2</b>                                                                                                                                    | <b>1</b>                                                                                                                                 |
|                         | Actively looks for and suggests solutions to problems.                                                                                      | Refines solutions suggested by others.                                                                                                             | Does not suggest or refine solutions, but is willing to try out solutions suggested by others.                                              | Does <i>not try</i> to solve problems or help others solve problems. Lets others do the work.                                            |
| <b>Group Efficacy</b>   | <b>4</b>                                                                                                                                    | <b>3</b>                                                                                                                                           | <b>2</b>                                                                                                                                    | <b>1</b>                                                                                                                                 |
|                         | <i>Routinely</i> monitors group effectiveness and works to make it more effective.                                                          | <i>Semi-consistently</i> monitors group effectiveness and suggests ways to make the group                                                          | <i>Occasionally</i> monitors group effectiveness and gives some effort to make group more effective.                                        | <i>Rarely</i> monitors the effectiveness of the group and does not work to make it more effective.                                       |

---

more effective.

---

Compiled from several peer evaluation rubrics in the public domain.
